# Supplementary material for: Characterization of hERG1 channel role in mouse colorectal carcinogenesis
Source: PubMed Central journal article supplement (PMC3892791; doi:10.1002/cam4.72), 2013-07-22
Supplement: cam40002-0583-sd1.pdf [file cam40002-0583-sd1.pdf]

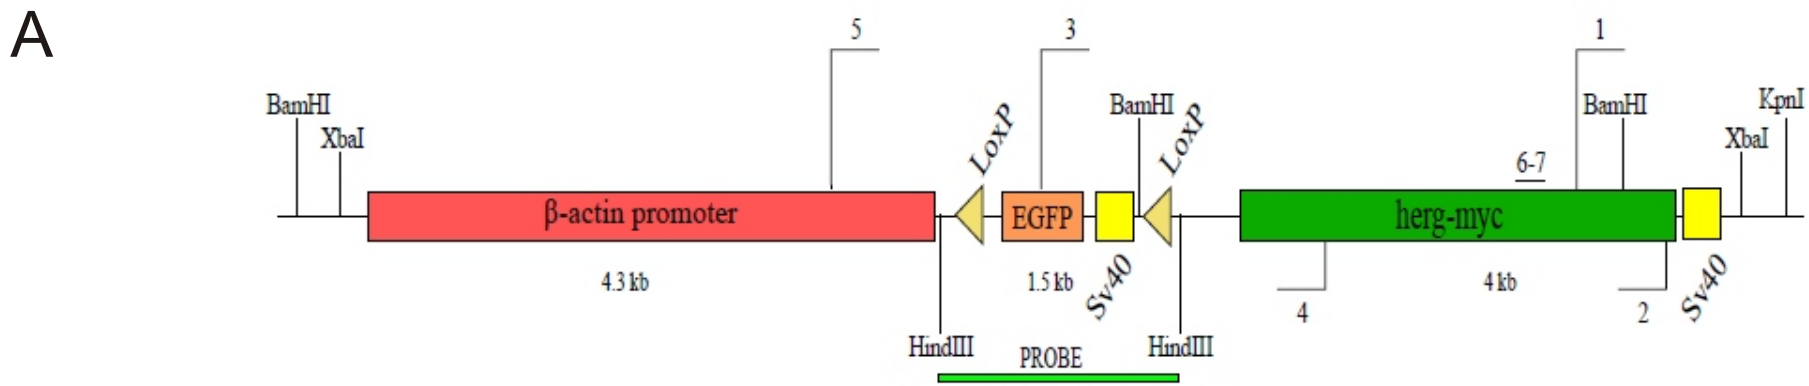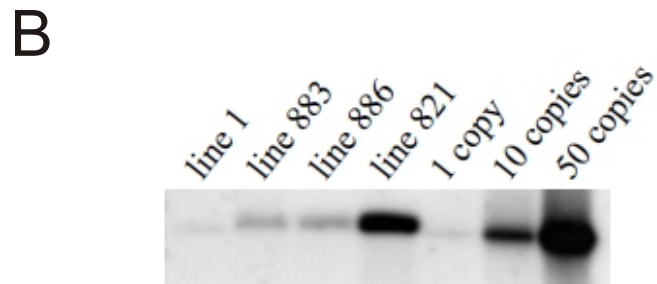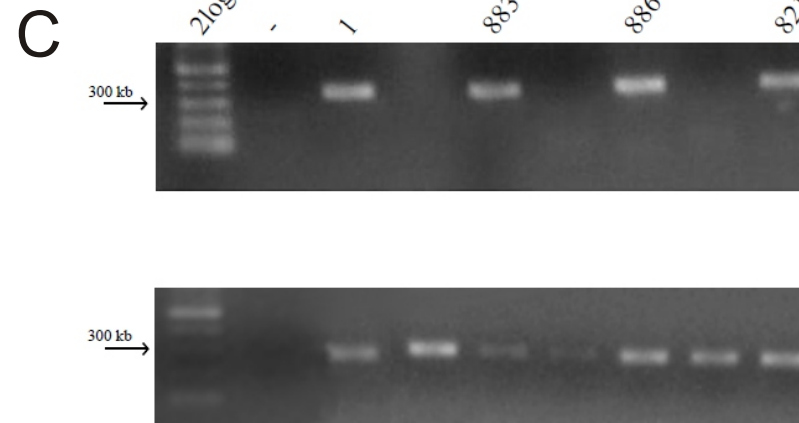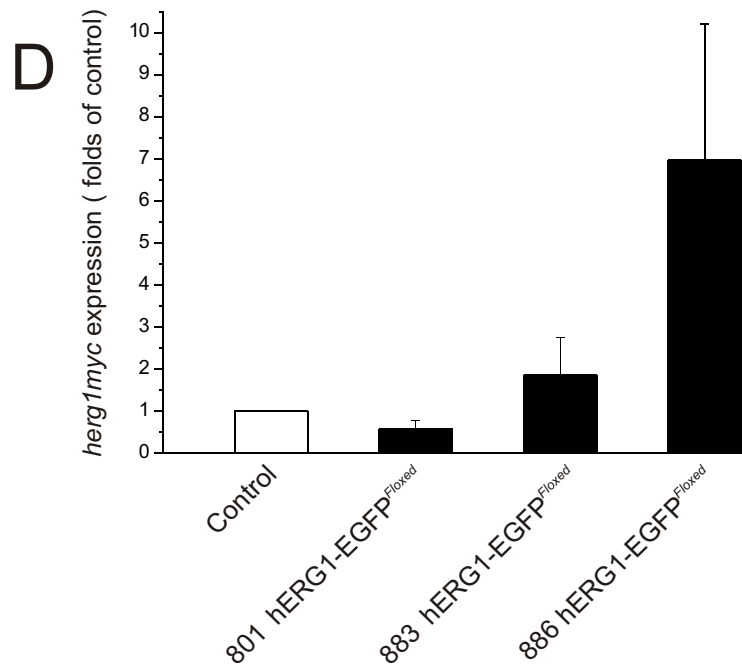

**E**

```

CCCAACGAGAAGCGCGATCACATGGTCCTGCTGGAGTTCGTGACCGCCGCC
GGGATCACTCTCGGCATGGACGAGCTGTACAAGTAAGAATTCTCGCTAGATA
AGTAATGATCTTAATCAGCCATATCACATCTGTAGAGGTTTTACTTGCTTAAAAA
ACCTCCCACACCTCCCCCTGAACCTGAAACATAAAATGAATGCAATTGTTGTTAACT
TGTTATTGCAGCTTATAATGGTTACAAATAAAGCAATAGCATCACAAATTCACAAATAA
AGCAATTTTTCTACTGCATTCTAGTTGTGGTTTGTCCAAACTCATCAATGTATCTTATCAT
GTCTGGATCATCGATCGCGCGCAGATCTGTATGATGATCATTGCAATTGGATCC
GGATAACTTCGTATAGCATAACATCTATACGAAGTTATCCTAGGGGAATTCGACAT
CAAGCTTCTCAGGATGCCGGTGC GGAGGGGCCACG
  
```
