# Supplementary material for: Characterization of hERG1 channel role in mouse colorectal carcinogenesis
Source: PubMed Central journal article supplement (PMC3892791; doi:10.1002/cam4.72), 2013-07-22

A

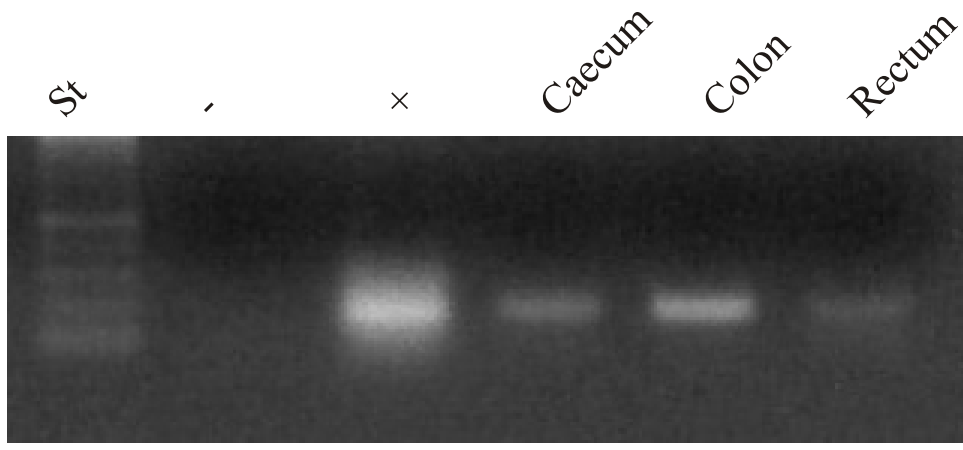

B

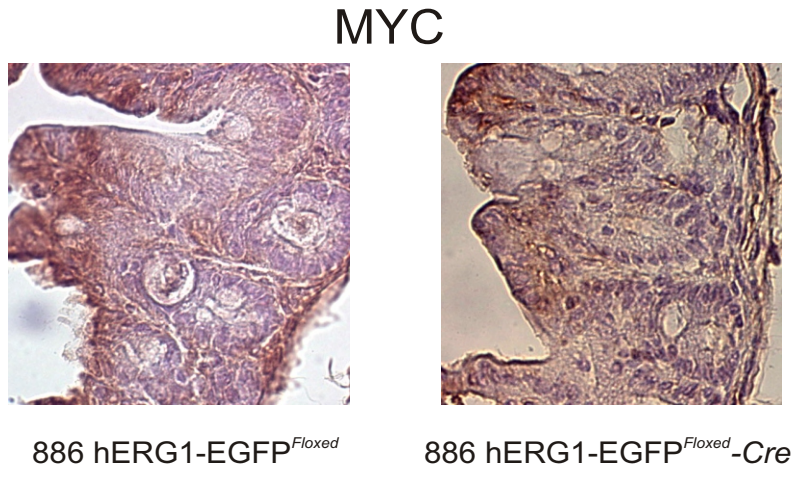

C

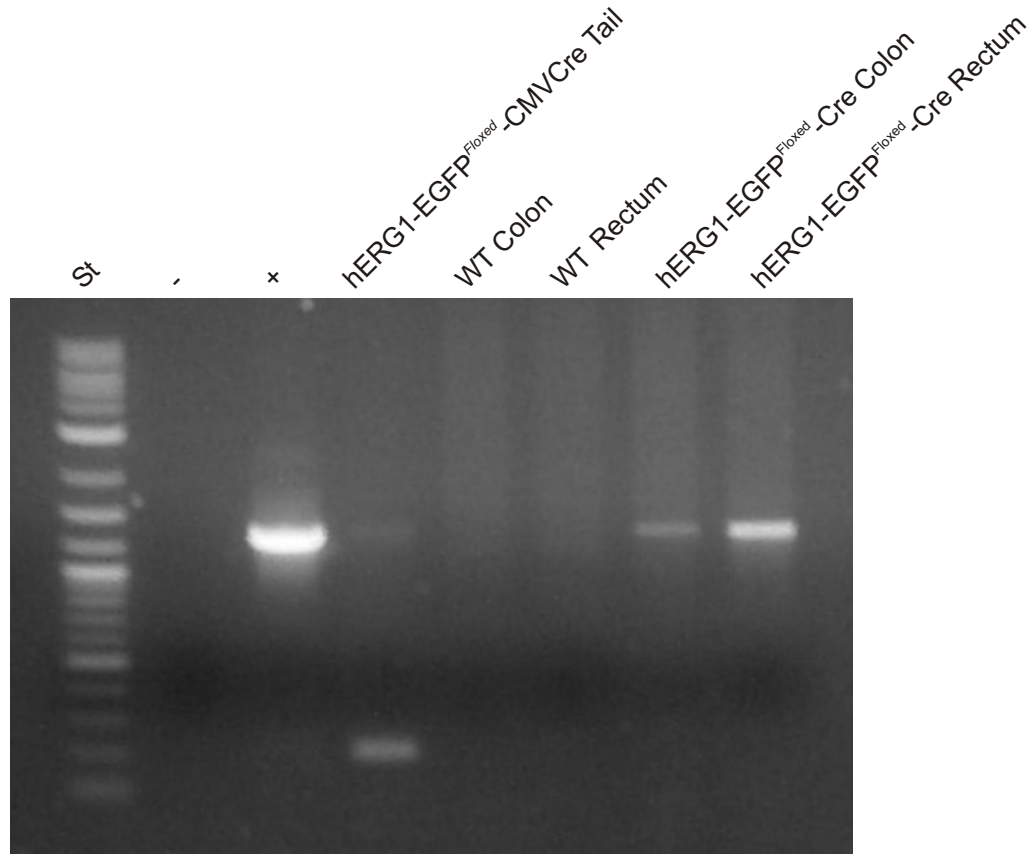

Supplement: cam40002-0583-sd2.pdf [file cam40002-0583-sd2.pdf]
